# Supplementary material
Source: publisher site journal article supplement (https://www.dovepress.com/article/499167)
Supplement: Supplementary file 1 [file get_supplementary_file.php]

# Supplementary information

This appendix addresses the definition of variables.

**Amputation NOMESCO procedure codes[1]**

| **Primary Major Amputations** | |
| --- | --- |
| *Above Knee Amputation* | |
| Hip disarticulation | KNFQ09 |
| Transfemoral amputation  Other amputation on the femur/hip | KNFQ19  KNFQ99 |
| *Below Knee Amputation* | |
| Knee disarticulation | KNGQ09 |
| Transtibial amputation  Other amputation on knee/tibia | KNGQ19  KNGQ99 |
| *Revision codes* |  |
| KNGQ29  KNGQ29A  KNGQ29B  KNFQ29  KNFQ29A  KNFQ29B | Stump revision knee/lower leg  Stump revision after knee disarticulation  Stump revision after transtibial amputation  Stump revision hip/tight  Stump revision after hip disarticulation  Stump revision after transfemoral amputation |

Any of the listed amputation codes above counts as a subsequent event. The subsequent event is not side specific. A case is excluded in case of a revision code without a prior primary amputation code.

Osseointegration codes are excluded**:** KNGQ39, KNGQ49 KNFQ39, KNFQ49

KNGQ99/KNFQ99 are grouped as Transfemoral amputation (KNFQ19) or Transtibial amputation (KNGQ19), respectively.

| Supplemental table 1 - CCI comorbidity | |
| --- | --- |
| Comorbidity | **ICD10-diagnosis code** |
| Myocardial infarct | DI21*, DI22*, DI252* |
| Congestive heart failure | DI099*, DI110* DI130*, DI132*, DI255*, DI420*, DI425*, DI426*, DI427*, DI428*, DI429*, DI43*, DI50*, DP290* |
| Peripheral vascular disease | DI70*, DI71*, DI731*, DI738*, DI739*, DI771*, DI790*, DI792*, DK551*, DK558*, DK559*, DZ958*, DZ959* |
| Cerebrovascular disease | DG45-6* DH340, DI60-9* |
| Dementia | DF00-3*, DF051*, DG30*, DG311 |
| Chronic pulmonary disease | DI278-9 DJ40-7*, DJ60-7*, DJ684, DJ701, DJ703 |
| Rheumatic disease | DM05-6*, DM315, DM32-4*, DM351, DM353, DM360 |
| Ulcer disease | DK25-8* |
| Mild lever disease | DB18*, DK700-3, DE709, DK713-15, DK717, DK73-4*, DK760, DK762-4*, DK768-9*, DZ944 |
| Diabetes (without organ damage) | DE100-1, DE106, DE108-11, DE116, DE118-21*, DE126, DE128-31*, DE136, DE138-41*, DE146, DE148-49* |
| Diabetes (with organ damage) | DE102-5*, DE107, DE112-5*, DE117, DE122-5*, DE127, DE132-5*, DE137, DE142-5*, DE147 |
| Hemiplegia or paraplegia | DG041, DG114, DG801, DG802, DG81*, DG82*, DG830-4, DG839 |
| Moderate or severe renal disease | DN032-37, DN052-57, DN18*-19*, DN250*, DZ490-2, DZ940 DZ992 |
| Any malignancy | DC00*- DC26*, DC30*-DC34*, DC37*-DC41*, DC43*, DC45*-DC58*, DC60*-DC76*, DC81*-DC85*, DC88*, DC90*-DC97* |
| Moderate or severe liver disease | DI850, DI859, DI864*, DI982, DK704*, DK711*, DK721, DK729*, DK765, DK766*, DK767 |
| Metastatic solid tumor | DC77*, DC78*, DC79*, DC80* |
| AIDS/HIV | DB20*, DB21*, DB22*, DB24* |

| Supplementary table 2 - ICD-10 codes included in mediation analysis | |
| --- | --- |
| Abnormal weight loss | DR634, DR649 |
| Unary tract infection | DN300, DN390, DN308C, DN309, DN308 |
| Dehydration | DE869A, DE869, DE869B |
| Delirium | DF050, DF059, DF058 |
| Fever | DR509 |
| Electrolyte disturbances | DE871, DE871A, DE875-6, DE870* |
| Infection | DA90*, DA499 |
| Pulmonary embolism | DI269, DI269A, DI260 |
| Pneumonia | DJ158-9, DJ189, DJ229*. DJ168, DJ180-1 |
| Sepsis | DA419, DA419B-C, DR572, DA40-1* |
| Pressure sores | DL89* |
| Enteritis | DA04*, DA08*, DA09* |
| Anemia | DD649, DD629, DD648 |
| Obstipation | DK590, DK590A |

| Supplementary table 3 – Full mediation analysis, women. | | | | | | | | |
| --- | --- | --- | --- | --- | --- | --- | --- | --- |
|  | | Women | |  |  |  |  |  |
|  | **Women, N** | | **Mediator, N** | | **HR TE** (95% CI) | **HR CDE** (95% CI) | **HR PE** (95% CI) | **PE** % (95% CI) |
| Abnormal weight loss | | 4,610 | | 11 | 13.38 (11.55-15.50) | 13.45 (11.63-15.55) | 0.99 (0.97-1.01) | **0 (0-1.6)** |
| Unary tract infection | | 4,123 | | 306 | 14.16 (12.11-16.55) | 13.56 (11.58-15.88) | 1.04 (1.02-1.06) | **4.5 (2.7-6.5)a** |
| Dehydration | | 4,456 | | 209 | 13.71 (11.78-15.95) | 13.18 (11.30-15.36) | 1.04 (1.01-1.07) | **4.1 (1.2-7.3)a** |
| Delirium | | 4,653 | | 65 | 13.24 (11.42-15.35) | 12.98 (11.19-15.05) | 1.02 (1.01-1.03) | **2.1 (0.8-3.5)a** |
| Fever | | 4,591 | | 48 | 13.46 (11.62-15.60) | 13.35 (11.52-15.47) | 1.01 (0.99-1.02) | **0.9 (0-2.0)** |
| Electrolyte disturbances | | 4,437 | | 126 | 13.56 (11.68-15.74) | 13.21 (11.37-15.35) | 1.03 (1.01-1.04) | **2.7(0.8-4.6)a** |
| Infection | | 4,437 | | 101 | 12.82 (11.04-14.90) | 12.63 (10.86-14.68) | 1.02(1.00-1.03) | **1.7 (0.3-3.0)a** |
| Pulmonary embolism | | 4,588 | | 48 | 13.40 (11.56-15.52) | 13.27 (11.45-15.38) | 1.01 (1.00-1.02) | **1.02 (0-2.0)** |
| Pneumonia | | 4,078 | | 332 | 12.95 (11.09-15.12) | 11.70 (9.98-13.71) | 1.11 (1.07-1.15) | **10.5 (7.1-13.9)a** |
| Sepsis | | 4,305 | | 318 | 12.75 (10.93-14.88) | 10.87 (9.28-12.73) | 1.17 (1.12-1.23) | **16.03 (11.7-20.3)a** |
| Pressure sores | | 4,325 | | 183 | 13.28 (11.42-15.45) | 12.87 (11.05-14.99) | 1.03 (1.01-1,05) | **3.4 (1.4-5.3)a** |
| Enteritis | | 4,516 | | 130 | 13.21 (11.38-15.33) | 12.98 (11.18-15.07) | 1.02 (1.01-1.03) | **1.8 (0.7-2.9)a** |
| Anemia | | 4,308 | | 165 | 14.16 (12.18-16.46) | 14.00 (12.04-16.28) | 1.01 (1.00-1,02) | **1.2 (0.3-2.1)a** |
| Obstipation | | 4,561 | | 72 | 13.39 (11.55-15.52) | 13.23 (11.41-15.34) | 1.01(1.0-1.02) | **1.3(0.2-2.4)a** |
| Index AKA | | | | | | | | |
| Abnormal weight loss | | 3,262 | | * |
| Unary tract infection | | 2,895 | | 220 | 15.72 (13.27-18.62) | 15.13 (12.75-17.96) | 1.04 (1.02-1.06) | **4.0 (1.8-6.2)a** |
| Dehydration | | 3,134 | | 150 | 15.48 (13.13-18.25) | 14.95 (12.65-17.67) | 1.03 (1.01-1.06) | **3.6 (0.7-6.5)a** |
| Delirium | | 3,288 | | 43 | 14.93 (12.70-17.55) | 14.78 (12.57-17.38) | 1.01(0.99-1.02) | **1.1 (0-2.3)** |
| Fever | | 3,246 | | 30 | 15.17 (12.92-17.83) | 15.07 (12.82-17.70) | 1.01(0.99-1.02) | **0.7 (0-1.9)** |
| Electrolyte disturbances | | 3,129 | | 85 | 15.02 (12.76-17.68) | 14.63 (12.41-17.25) | 1.03(1-1.05) | **2.7(0.5-5.0)** |
| Infection | | 3,139 | | 74 | 14.49 (12.30-17.07) | 14.30 (12.14-16.86) | 1.01(0.99-1.02) | **1.4(0-2.8)** |
| Pulmonary embolism | | 3,253 | | 35 | 15.25 (12.98-17.92) | 15.10 (12.86-17.75) | 1.01 (0.99-1.02) | **1.05 (0-2.1)** |
| Pneumonia | | 2,868 | | 244 | 14.58 (12.30-17.28) | 13.22 (11.09-15.75) | 1.10 (1.06-1.15) | **10.0 (6.1-13.9)a** |
| Sepsis | | 3,048 | | 227 | 14.45 (12.21-17.10) | 12.51 (10.51-14.89) | 1.15(1.09-1.22) | **14.4 (9.3-19.5)a** |
| Pressure sores | | 3,055 | | 139 | 15.03 (12.73-17.75) | 14.63 (12.37-17.30) | 1.03 (1.01-1.05) | **2.8 (0.97-4.7)a** |
| Enteritis | | 3,200 | | 83 | 14.89 (12.65-17.52) | 14.62 (12.42-17.21) | 1.02 (1.01-1.03) | **1.9 (0.5-3.3)a** |
| Anemia | | 3,041 | | 119 | 15.50 (13.13-18.31) | 15.30 (12.96-18.07) | 1.01(1.0-1.03) | **1.3 (0-2.7)** |
| Obstipation | | 3,229 | | 54 | 15.18 (12.93-17.84) | 15.07 (12.82-17.70) | 1.01 (0.99-1.02) | **0.8 (0-1.7)** |
| Index BKA | | | | | | | | |
| Abnormal weight loss | | 1,348 | | * |  |  |  |  |
| Unary tract infection | | 1,228 | | 86 | 8.26 (5.62-12.14) | 7.91 (5.35-11.69) | 1.04 (1.0-1.08) | **4.8(0.2-9.4)a** |
| Dehydration | | 1,322 | | 59 | 7.75 (5.36-11.20) | 7.46 (5.19-10.72) | 1.04(0.95-1.13) | **4.3 (0-13.3)** |
| Delirium | | 1,365 | | 22 | 7.58 (5.35-10.73) | 7.03 (4.99-9.90) | 1.08 (0.98-1.8) | **8.4 (0-17.9)** |
| Fever | | 1,345 | | 18 | 7.74 (5.47-10.96) | 7.64 (5.40-10.82) | 1.01 (0.98-1.04) | **1.4 (0-3.9)** |
| Electrolyte disturbances | | 1,308 | | 41 | 8.22 (5.78-11.68) | 8.05 (5.67-11.44) | 1.02(0.99-1.05) | **2.3 (0-5.2)** |
| Infection | | 1,298 | | 27 | 7.09 (4.96-10.13) | 6.95 (4.86-9.94) | 1.02 (0.99-1.05) | **2.4(0-5.9)** |
| Pulmonary embolism | | 1,335 | | 13 | 7.24 (5.11-10.26) | 7.20 (5.08-10.22) | 1.01 (0.98-1.02) | **0.6(0-2.9)** |
| Pneumonia | | 1,210 | | 88 | 7.28 (5.05-10.50) | 6.73 (4.70-9.64) | 1.08 (1.0-1.16) | **8.7 (1.9-16.5)a** |
| Sepsis | | 1,257 | | 91 | 7.12 (4.97-10.18) | 5.50 (3.84-7.88) | 1.29 (1.12-1.48) | **26.4 (13.8-39.0)a** |
| Pressure sores | | 1,270 | | 44 | 7.64 (5.40-10.82) | 7.33 (5.17-10.40) | 1.04(0.99-1.09) | **4.7 (0-9.6)** |
| Enteritis | | 1,316 | | 47 | 7.65 (5.37-10.89) | 7.50 (5.26-10.68) | 1.02 (0.98-1.05) | **2.3 (0-5.8)** |
| Anemia | | 1,267 | | 46 | 8.98 (6.34-12.72) | 8.92 (6.28-12.65) | 1.0 (0.9-1.02) | **0.7 (0-2.6)** |
| Obstipation | | 1,332 | | 18 | 7.43 (5.21-10.59) | 7.15 (5.00-10.23) | 1.04 (0.98-1.08) | **4.3 (0-9.6)** |
| * Exact value under 5. Censored due to Danish law  aSignificant  Explanation:  TE: Total effect  CDE: Controlled direct effect  PE: Proportion eliminated  HR TE: adjusted for CCI comorbidities and age. HR CDE: Adjusted for CCI comorbidities, age and the potential mediation factor. The mediator was included as a time-dependent variable.  HR PE: HRPE= HR TE / HR CDE  PE= (HR TE – HR CDE/ HR TE-1). For HR PE and PE Cis were obtained by bootstrapping using 100 replicates.  Individuals with preexisting registration of the mediator, was excluded from analysis.  MLEA: Major lower extremity amputation  AKA: Above knee amputation  BKA: Below knee amputation | | | | | | | | |

| Supplementary table 4– Full mediation analysis, men. | | | | | | |
| --- | --- | --- | --- | --- | --- | --- |
|  | Men |  |  |  |  |  |
|  | **Men, N** | **Mediator, N** | **HR TE** (95% CI) | **HR CDE** (95% CI) | **HR PE** (95% CI) | **PE** % (95% CI) |
| Abnormal weight loss | 7,013 | 22 | 13.93 (12.16-15.96) | 13.92 (12.15-15.95) | 1.00(0.99-1.01) | **0(0-0.9)** |
| Unary tract infection | 6,550 | 336 | 15.72 (13.64-18.13) | 15.27 (13.22-17.64) | 1.03(1.02-1.04) | **3.1 (1.8-4.4)a** |
| Dehydration | 6,895 | 228 | 14.72 (12.82-16.91) | 14.22 (12.37-16.35) | 1.03(1.01-1.06) | **3.7 (1.5-5.8)a** |
| Delirium | 7,023 | 103 | 14.15 (12.34-16.23) | 13.70 (11.93-15.73) | 1.03(1.02-1.05) | **3.4 (1.7-5.1)a** |
| Fever | 6,932 | 76 | 14.45 (12.60-16.56) | 14.40 (12.56-16.51) | 1.0 (0.99-1.01) | **0.4 (0-0.8)** |
| Electrolyte disturbances | 6,776 | 146 | 13.98 (12.17-16.07) | 13.74 (11.95-15.80) | 1.02(1.01-1.03) | **1.8(0.6-3.0)a** |
| Infection | 6,692 | 144 | 14.05 (12.20-16.17) | 13.76 (11.94-15.85) | 1.02 (1.00-1.03) | **2.2 (0.9-3.4)a** |
| Pulmonary embolism | 6,986 | 62 | 14.04 (12.24-16.09) | 13.86 (12.09-15.89) | 1.01 (1-1.02) | **1.3 (0.4-2.3)a** |
| Pneumonia | 6,177 | 493 | 13.42 (11.58-15.54) | 11.56 (9.93-13.46) | 1.16 (1.12-1.20) | **14.9 (11.6-18.2)a** |
| Sepsis | 6,538 | 577 | 13.28 (11.47-15.38) | 11.20 (9.65-13.00) | 1.19 (1.14-1.23) | **16.9 (13.4-20.4)a** |
| Pressure sores | 6,650 | 240 | 14.04 (12.20-16.15) | 13.50 (11.72-15.54) | 1.04 (1.02-1.06) | **4.2 (2.4-5.8)a** |
| Enteritis | 6,943 | 191 | 14.35 (12.53-16.44) | 14.16 (12.35-16.23) | 1.01 (1.00-1.02) | **1.5 (0.4-2.5)a** |
| Anemia | 6,588 | 267 | 14.61 (12.68-16.82) | 14.42 (12.52-16.62) | 1.01 (1.0-1.02) | **1.3 (0.4-2.2)a** |
| Obstipation | 6,958 | 80 | 14.17 (12.37-16.24) | 14.14 (12.34-16.21) | 1.0 (0.99-1.01) | **0.2 (0-0.8)** |
| Index AKA | | | | | | |
| Abnormal weight loss | 3,963 | 17 | 14.82 (12.60-17.42) | 14.77 (12.56-17.37) | 1.0(0.99-1.01) | **0 (0-1.2)** |
| Unary tract infection | 3,663 | 214 | 16.67 (14.06-19.77) | 16.17 (13.61-19.22) | 1.03 (1.01-1.05) | **3.2 (1.1-5.2)a** |
| Dehydration | 3,862 | 133 | 16.11 (13.65-19.02) | 15.71 (13.29-18.56) | 1.03 (1.01-1.05) | **2.7 (0.6-4.8)a** |
| Delirium | 3,941 | 61 | 15.03 (12.76-17.71) | 14.71 (12.48-17.35) | 1.02 (1.01-1.04) | **2.3 (0.7-3.8)a** |
| Fever | 3,916 | 40 | 15.45 (13.13-18.19) | 15.41 (13.09-18.14) | 1.00(0.99-1.01) | **0.3 (0-0.9)** |
| Electrolyte disturbances | 3,827 | 88 | 15.10 (12.80-17.82) | 14.90 (12.62-17.59) | 1.01(1.0-1.03) | **1.5 (0.1-2.8)a** |
| Infection | 3,781 | 83 | 14.88 (12.58-17.60) | 14.47 (12.22-17.13) | 1.03(1.01-1.04) | **2.9 (1.5-4.3)a** |
| Pulmonary embolism | 3,944 | 38 | 14.91 (12.67-17.54) | 14.72 (12.51-17.33) | 1.01 (1-1.02) | **1.3 (0.3-2.4)a** |
| Pneumonia | 3,425 | 312 | 14.49 (12.18-17.24) | 12.49 (10.43-14.96) | 1.16 (1.12-1.20) | **14.8 (11.2-18.4)a** |
| Sepsis | 3,603 | 355 | 14.53 (12.20-17.31) | 12.61 (10.56-15.06) | 1.15(1.11-1.2) | **14.2 (10.5-18)a** |
| Pressure sores | 3,735 | 152 | 15.29 (12.94-18.08) | 14.47 (12.23-17.12) | 1.06(1.03-1.09) | **5.7(3.0-8.5)a** |
| Enteritis | 3,934 | 95 | 15.35 (13.06-18.05) | 15.19 (12.91-17.88) | 1.01 (0.99-1.02) | **1.1(0-2.2)** |
| Anemia | 3,708 | 152 | 15.61 (13.17-18.49) | 15.47 (13.05-18.33) | 1.01(1.0-1.02) | **0.9 (0-1.8)** |
| Obstipation | 3,927 | 49 | 14.98 (12.73-17.63) | 14.95 (12.70-17.59) | 1.0 (0.99-1.01) | **0.2 (0-0.9)** |
| Index BKA | | | | | | |
| Abnormal weight loss | 3,050 | 5 | 11.42 (8.86-14.72) | 11.52 (8.93-14.85) | 0.99(0.87-1.0) | **0 (0-0.3)** |
| Unary tract infection | 2,892 | 122 | 13.14 (10.07-17.13) | 12.82 (9.81-16.74) | 1.02 (0.99-1.05) | **2.6 (0-5.3)** |
| Dehydration | 3,033 | 95 | 11.47 (8.86-14.86) | 10.86 (8.37-14.08) | 1.06(1.01-1.11) | **5.9 (1.0-10.7)a** |
| Delirium | 3,082 | 42 | 11.65 (9.02-15.03) | 10.99 (8.49-14.24) | 1.06(1.01-1.10) | **6.1 (1.8-10.4)a** |
| Fever | 3,016 | 36 | 11.71 (9.06-15.14) | 11.66 (9.02-15.07) | 1.0(0.99-1.02) | **0.5 (0-1.7)** |
| Electrolyte disturbances | 2,949 | 58 | 11.08 (8.52-14.41) | 10.86 (8.35-14.12) | 1.02 (0.99-1.05) | **2.1 (0-4.8)** |
| Infection | 2,911 | 61 | 11.54 (8.87-15.01) | 11.37 (8.73-14.82) | 1.01 (0.99-1.04) | **1.5 (0-3.8)** |
| Pulmonary embolism | 3,042 | 24 | 11.58 (8.97-14.95) | 11.43 (8.85-14.75) | 1.01 (0.99-1.03) | **1.4(0-2.9)** |
| Pneumonia | 2,752 | 181 | 10.59 (8.00-14.03) | 9.47 (7.11-12.61) | 1.12 (1.06-1.18) | **11.7 (6.6-16.8)a** |
| Sepsis | 2,835 | 222 | 10.25 (7.77-13.51) | 8.19 (6.20-10.81) | 1.25(1.15-1.35) | **22.3 (15.7-28.9)a** |
| Pressure sores | 2,915 | 88 | 10.91 (8.38-14.21) | 10.66 (8.19-13.88) | 1.02 (0.99-1.05) | **2.5(0-5.3)** |
| Enteritis | 3,009 | 96 | 11.55 (8.93-14.93) | 11.27 (8.71-14.59) | 1.02 (0.99-1.05) | **2.6 (0-5.2)** |
| Anemia | 2,880 | 115 | 11.85 (9.15-15.36) | 11.54 (8.88-15.00) | 1.03(1.0-1.05) | **2.8(0.4-5.2)a** |
| Obstipation | 3,031 | 31 | 11.84 (9.20-15.25) | 11.82 (9.17-15.23) | 1.0 (0.99-1.01) | **0.2(0-1.4)** |
| aSignificant  Explanation:  TE: Total effect  CDE: Controlled direct effect  PE: Proportion eliminated  HR TE: adjusted for CCI comorbidities and age. HR CDE: Adjusted for CCI comorbidities, age and the potential mediation factor. The mediator was included as a time-dependent variable.  HR PE: HRPE= HR TE / HR CDE  PE= (HR TE – HR CDE/ HR TE-1). For HR PE and PE Cis were obtained by bootstrapping using 100 replicates.  Individuals with preexisting registration of the mediator, was excluded from analysis.  MLEA: Major lower extremity amputation  AKA: Above knee amputation  BKA: Below knee amputation | | | | | | |

**Supplemental figures a-d**

**Cumulative incidence function, visualizing the probability of death in the first 2 years, stratified by sex and initial amputation level**

1. **Women, Above knee amputation**

1. **Women, Below knee amputation**

1. **Men, above knee amputation**

1. **Men, below knee amputation**

1. NOMESCO Classification of Surgical Procedures <https://norden.diva-portal.org/smash/get/diva2:970547/FULLTEXT01.pdf> [Accessed April 2024]
